# Supplementary material for: Surface patterning of (bio)molecules onto the inner wall of fused-silica capillary tubes
Source: Royal Society of Chemistry journal article supplement (doi:10.1039/b811786a), 2008-01-01
Supplement: b811786a.pdf [file b811786a.pdf]

## Supporting Information

### Surface patterning of (bio)molecules onto the inner wall of fused-silica capillary tubes

Nabil Dendane,<sup>[a, b]</sup> Antoine Hoang,<sup>[b]</sup> Olivier Renaudet,<sup>[a]</sup> Françoise Vinet,<sup>[b]</sup> Pascal Dumy,<sup>[a]</sup> and Eric Defrancq,<sup>[a]\*</sup>

<sup>[a]</sup> Département de Chimie Moléculaire - UMR CNRS 5250, ICMG FR2607, Université Joseph Fourier, BP 53, 38041 Grenoble Cedex 9, (France)

<sup>[b]</sup> LETI-CEA, 17 rue des Martyrs, 38054 Grenoble Cedex 9, (France)

#### Experimental Section

**Materials and methods.** All solvents and reagents used were of highest purity available. *O*-[2-(6-oxocaproylamino)ethyl]-*O'*-methylpolyethylene glycol (MW = 2000), FITC labelled anti-HA antibody, anti-SDF-1, Concanavalin A and Bovine Serum Albumin (BSA) were purchased from Sigma-Aldrich. The complementary Cy3 labelled oligonucleotide was purchased from MWG Biotech and the hybridization solution from Sigma. Flexible fused-silica capillaries with UV-transparent coating (interior diameter: 100  $\mu$ m) were obtained from Polymicro Technologies (Phoenix, AZ). The irradiation experiments were performed on an Olympus inverted microscope model IX60, equipped with a 100W mercury lamp and a 365 nm interference filter. The patterning was performed by irradiation of the focused zone. Scanning experiments were carried out using a Gentac Scanner (Genomic Solution<sup>®</sup>). RP-HPLC analysis and purification of peptides and glycopeptide were performed on a Waters HPLC system with dual wavelength detector using the following solvent system: solvent A, water containing 1% TFA; solvent B, acetonitrile containing 1% TFA and 10% H<sub>2</sub>O with a linear gradient (5 to 100% B in 15 min.). UV absorbance was monitored at 214 nm and 250 nm simultaneously.

## Synthesis.

**Oligonucleotide Seq1.** The oligonucleotide sequence employed in the present work is 5'-d-XTTTTTGATAAACCCACTCTA-3' (**Seq1**) where X represents the 5'-aldehyde linker. It was prepared as previously reported.<sup>[1]</sup>

**Glyco-peptide 2.** The glyco-peptide **2** was prepared by adapting the previously reported method.<sup>[2]</sup> A brief protocol is reported below.

To a solution of cyclodecapeptide bearing aldehyde functions (2 mg, 1.6 mmol) in 10% aqueous acetic acid (1 mL), aminoxy  $\alpha$ -D-mannopyranosyl (3 mg, 16 mmol) was added. After stirring 1 h at room temperature, the reaction mixture was lyophilized. The crude tetravalent glyco-peptide was then dissolved in DMF (1 mL) and levulinic pentafluorophenol ester (1 mg, 3.2 mmol) was added. The pH of the solution was adjusted at 8 with DIEA. The reaction mixture was stirred for 30 minutes at room temperature. Purification by RP-HPLC afforded the glyco-peptide **2** as a white powder in a 52% yield (1.7 mg). ES-MS (positive mode): calcd for  $C_{84}H_{135}N_{19}O_{40}K$  2088.9  $[M+H]^+$ , found: 2088.6.

**Peptide 5:** Ser-HA peptide H-SGYPDVDPDYAGYPYDVPDYAGYPYDVPDYAS-NH<sub>2</sub> **4** was prepared in an automated peptide synthesizer (ABI433A, Applied BioSystem) by using the standard Fmoc/*t*Bu chemistry. Synthesis was performed on a 0.1 mmol scale on a MBHA resin. The peptide was cleaved from the resin and deprotected upon acidic treatment (TFA/water/TIS/EDT/*p*-cresol: 90/2.5/2.5/2.5/2.5) for 2 h at room temperature. The peptide was purified by RP-HPLC on a 7  $\mu$ m C18 Nucleosil column by using a linear water/acetonitrile gradient containing TFA (0.09% *v/v*; 22 mLmin<sup>-1</sup>, detection at 214 nm). ES-MS (positive mode): calcd for  $C_{171}H_{216}N_{32}O_{56}$  3613.5  $[M+H]^+$ , found: 3614.9. Subsequent oxidation of the *N*-terminal serine residue was performed using NaIO<sub>4</sub> (1.5 equiv) in water for 1 h. The glyoxylic peptide **5** was used without further purification for surfaces immobilization. ES-MS (positive mode): calcd for  $C_{170}H_{212}N_{32}O_{55}$  3581.5  $[M+H]^+$ , found: 3581.6.

### General protocol for aminoxy patterning of glass surfaces inside the capillary tubes.

*Step 1 - Hydration of the capillary tube:* The capillary tube was filled with an aq. ethanolic solution of NaOH (1g NaOH, 4 mL H<sub>2</sub>O, 3 mL EtOH) for 1 h, and washed successively with ultra-pure H<sub>2</sub>O, 0.2 N aq. HCl and H<sub>2</sub>O. The capillary tube was then dried under nitrogen.

*Step 2 - Silanization:* The capillary tube was filled with a 10 mM solution of silane **1** in trichloroethylene and incubated for overnight at room temperature. The capillary was then washed

with trichloroethylene followed by EtOH and dried under nitrogen. Finally, the capillary tube was cured at 110 °C for 3 h.

*Step 3 - Photodeprotection:* The capillary tube was filled with a 5% aq. pyridine solution and was mounted on the microscope stage. The irradiations were performed using a mercury lamp (100 W, 24 mW.cm<sup>-2</sup>) and were focused at different positions on the capillary. Each irradiation thus corresponded to a separate spot on the capillary array. The capillary was then washed with H<sub>2</sub>O and dried under nitrogen.

### **Immobilization protocol.**

*Carbohydrates 2 and 3.* The capillary was filled with a 10% acetic acid solution of glyco-peptide **2** (400 μM) for 1 hour or with a 0.4 M ammonium acetate buffer solution of GAG **3** (20 μM) for 2 min at room temperature. A constant reagent flow (10 μL.min<sup>-1</sup>) was applied by using a syringe pump. The capillary was then successively washed with H<sub>2</sub>O, 1% aq. SDS solution, H<sub>2</sub>O and finally dried under nitrogen. Bovin serum albumin solution (6 mg.mL<sup>-1</sup>) was next passed through the tube for 45 min and the capillary tube was then washed with 10 mM phosphate buffer (pH 7.4).

*HA Peptide 5.* The capillary was filled with an acetonitrile/0.4 M ammonium acetate buffer solution (1/1:v/v) of HA peptide **5** (20 μM) for 2 min at room temperature. A constant reagent flow (10 μL.min<sup>-1</sup>) was applied by using a syringe pump. The capillary was then successively washed with H<sub>2</sub>O, 1% aq. SDS solution, H<sub>2</sub>O and finally dried under nitrogen. Bovin serum albumin solution (6 mg.mL<sup>-1</sup>) was next passed through the tube for 45 min and the capillary tube was then washed with 10 mM phosphate buffer (pH 7.4).

*Tridecanal and pentafluorobenzaldehyde.* The capillary was filled with a toluene solution of tridecanal or pentafluorobenzaldehyde (100 mM) for 1 hour at room temperature. A constant reagent flow (10 μL.min<sup>-1</sup>) was applied by using a syringe pump. The capillary was then successively washed with H<sub>2</sub>O, 1% aq. SDS solution, H<sub>2</sub>O and finally dried under nitrogen. The capillary tube was then fully irradiated by using a mercury lamp (100 W, 24 mW.cm<sup>-2</sup>) for 10 sec. The capillary was next filled with a 0.4 M ammonium acetate buffer solution containing oligonucleotide-5'-aldehyde (**Seq1**, 20 μM) for 2 min at room temperature. A constant reagent flow (10 μL.min<sup>-1</sup>) was applied by using a syringe pump. The capillary was successively washed with H<sub>2</sub>O, 1% aq. SDS solution, H<sub>2</sub>O and finally dried under nitrogen.

*Polyethylene glycol:* The capillary was filled with a 0.4M ammonium acetate buffer of PEG **5** (20 μM) for 2 min at room temperature. A constant reagent flow (10 μL.min<sup>-1</sup>) was applied by using a

syringe pump. The capillary was then successively washed with H<sub>2</sub>O, 1% aq. SDS solution, H<sub>2</sub>O and finally dried under nitrogen. The capillary tube was then fully irradiated by using a mercury lamp (100 W, 24 mW.cm<sup>-2</sup>) for 10 sec. The capillary was next filled with a 0.4 M ammonium acetate buffer solution containing oligonucleotide-5'-aldehyde (**Seq1**, 20 μM) for 2 min. A constant reagent flow (0.1-10 μL.min<sup>-1</sup>) was applied by using a syringe pump. The capillary was successively washed with H<sub>2</sub>O, 1% aq. SDS solution, H<sub>2</sub>O and finally dried under nitrogen.

### **Binding studies.**

*For mannose residues:* The capillary was filled with a solution of FITC labelled concanavalin A (1 mg.mL<sup>-1</sup>) in 10 mM phosphate buffer (pH 7.4) for 1 hour at 39°C. The capillary was then washed with 10 mM phosphate buffer and scanned.

*For heparine residues:* The capillary was filled with a solution of FITC labelled SDF-1 chemokine (20 nM) in 10 mM phosphate buffer (pH 7.4) for 1 hour at 39°C. The capillary was then washed with 10 mM phosphate buffer and scanned.

*For peptide HA:* The capillary was filled with a solution of FITC labelled HA antibody (10 μg.mL<sup>-1</sup>) in 10 mM phosphate buffer (pH 7.4) for 1 hour at 39°C. The capillary was then washed with 10 mM phosphate buffer and scanned.

*For oligonucleotide (hybridization):* The capillary was filled with the hybridization solution of Cy3<sup>®</sup> labelled complementary oligonucleotide (10 nM) for 1 hour at 39 °C. The capillary was then washed with 2X SSC buffer and scanned.

### **References**

- [1] O. P. Edupuganti, Y. Singh, E. Defrancq, P. Dumy, *Chem. Eur. J.* **2004**, *10*, 5988.
- [2] a) O. Renaudet, P. Dumy, *Org. Lett.* **2003**, *5*, 243; b) Y. Singh, O. Renaudet, E. Defrancq, P. Dumy, *Org. Lett.* **2005**, *7*, 1359; c) M. Wilczewski, A. Van der Heyden, O. Renaudet, P. Dumy, L. Coche-Guérente, P. Labbé, *Org. Bioorg. Chem.* **2008**, *6*, 1114.
